# Supplementary material
Source: Springer Nature journal article supplement (https://www.springermedizin.de/resource/supplementary/12936_2011_2030_MOESM2_ESM.pdf/9543008)
Supplement: MOESM2 [file 9543008]

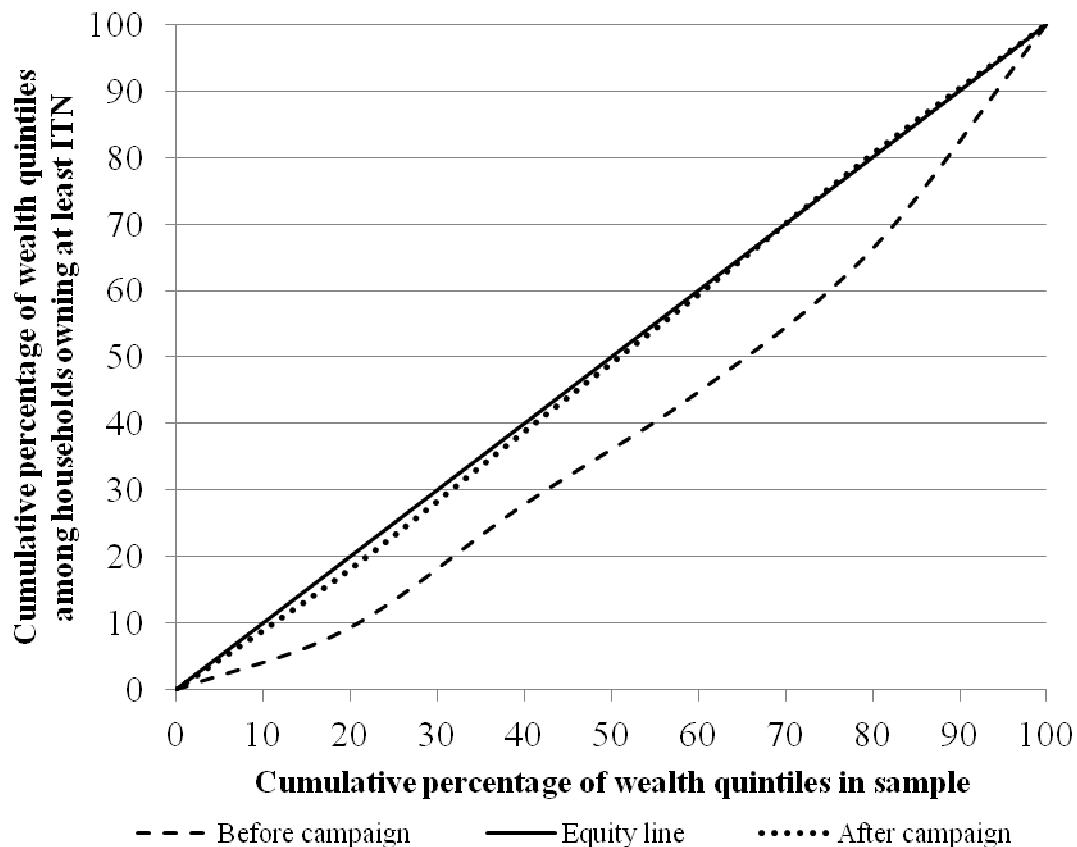

--- Before campaign

— Equity line

..... After campaign

**Concentration index (95% CI):**

Before the campaign: 0.21 (0.08 ; 0.34)

After the campaign: 0.02 (-0.02 ; 0.05)
